# Supplementary material for: Emissions of Volatile Organic Compounds (VOCs) from an Open-Circuit Dry Cleaning Machine Using a Petroleum-Based Organic Solvent: Implications for Impacts on Air Quality
Source: MDPI journal article supplement (doi:10.3390/atmos12050637), 2021-05-17
Supplement: s1 [file s1]

# **Emissions of Volatile Organic Compounds (VOCs) from an Open-Circuit Dry Cleaning Machine Using a Petroleum-Based Organic Solvent: Implications for Impacts on Air Quality**

Hyeonji Lee, Kyunghoon Kim, Yelim Choi, Daekeun Kim

## **Table of Contents**

**Table S1.** Volatile organic compounds detected in dry cleaning gas and their concentrations during the first 18 minutes of drying operation.

**Table S2.** Composition of VOCs in the organic solvent used in this study.

**Figure S1.** Schematic drawing of dry cleaning process employed in this study.

**Table S1.** Volatile organic compounds detected in dry cleaning gas and their concentrations during the first 18 minutes of drying operation.

|      | Compounds           | Vapor pressure<br>(mmHg) | Concentration (ppb) |       |       |        |        |
|------|---------------------|--------------------------|---------------------|-------|-------|--------|--------|
|      |                     |                          | 0 min               | 4 min | 8 min | 12 min | 18 min |
| (1)  | 1-Butene            | 1860                     | 5                   | 7     | 6     | 19     | 15     |
| (2)  | Butane              | 1810                     | 38                  | -*    | -     | 4      | -      |
| (3)  | Isopentane          | 688                      | 87                  | 67    | 99    | 119    | 30     |
| (4)  | Isoprene            | 551                      | 2                   | 2     | 3     | 3      | 1      |
| (5)  | Pentane             | 513                      | 19                  | 5     | 8     | 28     | 1      |
| (6)  | Methylene chloride  | 432                      | 52                  | 7     | 413   | 10626  | 17     |
| (7)  | Acrolein            | 264                      | 104                 | 47    | 66    | 78     | 100    |
| (8)  | Acetone             | 249                      | 891                 | 738   | 1182  | 10595  | 489    |
| (9)  | 2-Methylpentane     | 208                      | -                   | -     | -     | 155    | -      |
| (10) | 3-Methylpentane     | 186                      | -                   | -     | 2     | 357    | -      |
| (11) | Tetra hydrofuran    | 173                      | 6                   | -     | 18    | 230    | 36     |
| (12) | Hexene              | 173                      | -                   | -     | 1     | 2      | 1      |
| (13) | Hexane              | 150                      | 145                 | 26    | 1977  | 13055  | 53     |
| (14) | Methylcyclopentane  | 133                      | 6                   | -     | 22    | 1454   | -      |
| (15) | Vinyl Acetate       | 119                      | -                   | 16    | -     | -      | -      |
| (16) | Methyl ethyl ketone | 98.5                     | 13                  | 12    | 23    | 37     | 15     |
| (17) | Ethyl acetate       | 98.3                     | 14                  | -     | 3     | 1      | -      |
| (18) | Cyclohexane         | 93.9                     | 24                  | -     | 18    | 1516   | -      |
| (19) | Benzene             | 87.2                     | 7                   | 6     | 6     | 30     | 15     |
| (20) | 1,2-Dichloroethane  | 75.4                     | 6                   | 2     | 1     | 1      | 4      |
| (21) | Heptane             | 45.9                     | 2                   | 3     | -     | 42     | -      |
| (22) | 2-Methylheptane     | 45                       | 88                  | 265   | 46    | 2      | -      |
| (23) | Methylcyclohexane   | 41.6                     | 57                  | 92    | 6     | 0      | -      |
| (24) | MMA                 | 36.7                     | 2                   | 4     | 3     | 18     | 2      |
| (25) | Toluene             | 23.7                     | 24                  | 23    | 35    | 188    | 27     |
| (26) | MIBK                | 21.8                     | 4                   | 6     | 4     | 4      | 5      |
| (27) | 3-Methylheptane     | 20.4                     | 67                  | 212   | 38    | -      | -      |
| (28) | Tetrachloroethylene | 17.8                     | 8                   | 18    | 9     | -      | -      |
| (29) | Octane              | 14.8                     | 353                 | 1212  | 419   | 63     | 27     |
| (30) | Ethylbenzene        | 7.59                     | 16                  | -     | 9     | 44     | 22     |
| (31) | m,p-Xylene          | 6.81                     | 10                  | -     | -     | 15     | 6      |

|                 |       |      |       |       |       |      |
|-----------------|-------|------|-------|-------|-------|------|
| (32) Styrene    | 5.05  | 6    | -     | -     | 15    | 17   |
| (33) Nonane     | 4.96  | 1249 | 3891  | 4065  | 2237  | 983  |
| (34) Decane     | 1.73  | 1426 | 3381  | 4516  | 4831  | 2903 |
| (35) n-Undecane | 0.629 | 945  | 1202  | 2128  | 3363  | 2054 |
| (36) n-Dodecane | 0.236 | 108  | 97    | 238   | 702   | 235  |
| Toatl           |       | 5785 | 11342 | 15362 | 49834 | 7055 |
| Concentration   |       |      |       |       |       |      |

\* below method detection limit

Abbreviation: methyl methacrylate (MMA), methyl isobutyl ketone (MIBK)

**Table S2.** Composition of VOCs in the organic solvent used in this study. Among compounds mixed in the organic solvent, only 10 compounds recognized as ozone precursors were included in the analysis.

|      | Compounds    | Composition (%) |
|------|--------------|-----------------|
| (1)  | n-Undecane   | 43.11           |
| (2)  | Decane       | 34.42           |
| (3)  | n-Dodecane   | 9.03            |
| (4)  | Nonane       | 7.57            |
| (5)  | Octane       | 0.96            |
| (6)  | Ethylbenzene | 0.87            |
| (7)  | m,p-Xylene   | 0.84            |
| (8)  | Styrene      | 0.71            |
| (9)  | Isopentane   | 0.66            |
| (10) | o-Xylene     | 0.56            |
|      | Total        | 98.73*          |

\* Compounds which are not recognized as ozone precursors were not presented in this table.

Note: The composition in this table was not related with VOCs concentrations at exhaust gas during dry cleaning process, because we attained the composition from the organic solvent before the dry cleaning process.

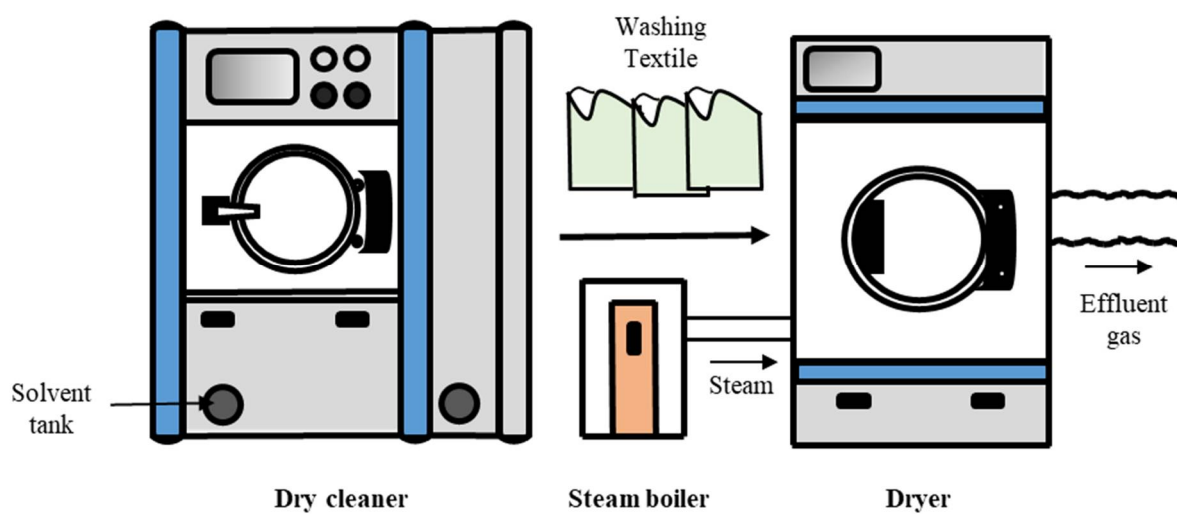

**Figure S1.** Schematic drawing of dry cleaning process employed in this study. Open-circuit system was used, which means that a dry cleaner and dryer were set separately. Effluent gas, emitted from the dryer during drying process, was sampled from the beginning of drying process to 18 minutes.
